# Supplementary material for: Fe–N4 engineering of S and N co-doped hierarchical porous carbon-based electrocatalysts for enhanced oxygen reduction in Zn–air batteries
Source: Royal Society of Chemistry journal article supplement (doi:10.1039/d0dt02704a), 2020-01-01
Supplement: d0dt02704a1.pdf [file d0dt02704a1.pdf]

# **Fe-N<sub>4</sub> engineering of S,N co-doped hierarchical porous carbon-based electrocatalysts for enhanced oxygen reduction in Zn-air battery**

Jingxia Gao <sup>a</sup>, Sa Liu <sup>\*, a</sup>, Ping Zhu <sup>a</sup>, Xinsheng Zhao <sup>\*, b</sup>, Guoxiang Wang <sup>c</sup>

<sup>a</sup> School of Chemistry and Materials Science, Jiangsu Key Laboratory of Green Synthetic for Functional Materials, Jiangsu Normal University, Xuzhou 221116, People's Republic of China

<sup>b</sup> School of Physics and Electronic Engineering, Jiangsu Normal University, Xuzhou 221116, People's Republic of China

<sup>c</sup> School of Light Industry & Chemical Engineering, Dalian Polytechnic University, Dalian 116034, People's Republic of China

## **Experimental section**

**Characterizations:** Scanning electron microscopy (SEM) was obtained on HITACHI S-8010. Transmission electron microscopy (TEM), high-resolution TEM (HRTEM) and scanning transmission electron microscope (STEM) were recorded by FEI Tecnai G2 F20. X-ray diffraction (XRD) was carried out on a Bruker AXS D8ADVANCE diffractometer. X-ray photoelectron spectroscopy (XPS) was used to evaluate the surface element on ESCALAB 250Xi.  $^{57}\text{Fe}$  Mössbauer spectrum was obtained with a  $^{57}\text{Co}:\text{Rh}$  source on a Topologic 500A spectrometer driving with a proportional counter at room temperature. Raman spectra were recorded on LabRAM HR800 equipment. The pores characterizations and surface area were obtained from nitrogen absorption/desorption isotherms measured on Quantachrome Autosorb IQ2-VP, and the pore size distribution were calculated by density function theory (DFT) method. Thermogravimetric analysis (TGA) was performed on a TA Q50 instrument with a heating rate of  $5\text{ }^{\circ}\text{C min}^{-1}$  and air atmosphere.

**Electrochemical characterizations:** Electrocatalytic performance was measured by a three-electrode system on electrochemical workstation (CHI 700D). Platinum wire and Ag/AgCl (in 3.5 M KCl) electrode were used as the counter electrode and reference electrode, respectively. 5 mg of as-prepared samples was dispersed in 0.6 ml of ethanol and 50  $\mu\text{L}$  of Nafion (5 wt.%). Then 6.5  $\mu\text{L}$  of the catalyst ink was dropped on 4 mm of rotating disk electrode (RDE) or rotating ring-disk electrode (RRDE) to obtain the working electrode. For comparison, the working electrode with

commercial Pt/C (20 wt.%) at a loading 100  $\mu\text{g cm}^{-2}$  (20  $\mu\text{g}_{\text{Pt}} \text{cm}^{-2}$ ) was also prepared as the above similar method.

Steady cyclic voltammetry (CV) was recorded between 0-1.2 V (vs. RHE) at a sweep rate of 50  $\text{mV s}^{-1}$  in  $\text{N}_2$  and  $\text{O}_2$ -saturated 0.1 M KOH. Linear sweep voltammetry (LSV) was collected at a scanning rate of 10  $\text{mV s}^{-1}$  and different electrode rotating rate (100-2500 rpm) in  $\text{O}_2$ -saturated 0.1 M KOH.

The Koutecky-Levich (K-L) plots were calculated by the following equations,

$$\frac{1}{j} = \frac{1}{j_k} + \frac{1}{j_L} = \frac{1}{j_k} + \frac{1}{B} \omega^{-1/2} \quad (1)$$

$$B = 0.2nFC_0D_0^{2/3}\nu^{-1/6} \quad (2)$$

Here,  $j_k$  is the kinetic current density ( $\text{mA cm}^{-2}$ ),  $j_L$  is the limiting diffusion current density ( $\text{mA cm}^{-2}$ ),  $n$  is the electron transfer number,  $F$  is the Faraday constant (96485  $\text{C mol}^{-1}$ ),  $C_0$  ( $1.2 \times 10^{-6} \text{ mol cm}^{-2}$ ) and  $D_0$  ( $1.9 \times 10^{-5} \text{ cm}^2 \text{ s}^{-1}$ ) are the concentration and diffusion coefficient of  $\text{O}_2$  in 0.1 M KOH, respectively.  $\nu$  is the kinematic viscosity of 0.1 M KOH ( $0.01 \text{ cm}^2 \text{ s}^{-1}$ ).

The  $\text{H}_2\text{O}_2$  yield and the electron transfer number were measured on RRDE by the following equations,

$$\text{H}_2\text{O}_2(\%) = \frac{200I_R}{I_R + NI_D} \quad (3)$$

$$n = \frac{4NI_D}{I_R + NI_D} \quad (4)$$

Here,  $I_D$  is the measured disk current (mA),  $I_R$  is the measured ring current (mA) when 1.2 V was applied to the ring,  $N$  is the electrode collection efficiency (42.4%).

Chronoamperometric response at 0.7 V was measured in the  $\text{O}_2$ -saturated 0.1 M

KOH solution with or without 1 M methanol.

Accelerated durability tests (ADTs) were carried out by continuous CV cycling (10000 cycles) in O<sub>2</sub>-saturated 0.1 M KOH at a scan rate of 200 mV s<sup>-1</sup> between 0.6 and 1.2 V.

**ZABs measurement:** A clean zinc plate of 0.5 mm thickness was served as anode of a home-made ZAB. 6 M KOH and 6 M KOH+0.2 M zinc acetate were used as electrolyte for primary ZAB and rechargeable ZAB, respectively. The air electrode was prepared as follows: the above as-prepared catalysts ink was dropped on the gas-diffusion layer attached with carbon paper of an effective area of 1 cm<sup>2</sup>. The catalyst loading was 0.5 mg cm<sup>-2</sup>. For comparison, the commercial Pt/C (20 wt.%) loaded air electrode was also prepared with a same catalyst loading.

The solid-state ZAB was assembled by using FeSN-HPC loaded GDL (1 mg cm<sup>-2</sup>) as air electrode, Zn plate as anode, and gel of polyvinyl alcohol (PVA)/KOH as the solid-state electrolyte. The gel electrolyte was prepared by a typical procedure as follows: 1.0 g of PVA was dissolved into 10 mL of H<sub>2</sub>O at 95 °C, followed by adding 1 mL of 18.0 M KOH solution. Subsequently, the mixture was stirred at 95 °C for 30 min to obtain a uniform solution. Then the solution was poured into a culture dish, frozen at -20 °C for 12 h and thawed at room temperature. The process was repeated three times to get a uniform gel electrolyte.

The discharge polarization curve of ZAB was obtained on CHI 700D, and the charge-discharge cycling was recorded on LAND testing system.

## Results

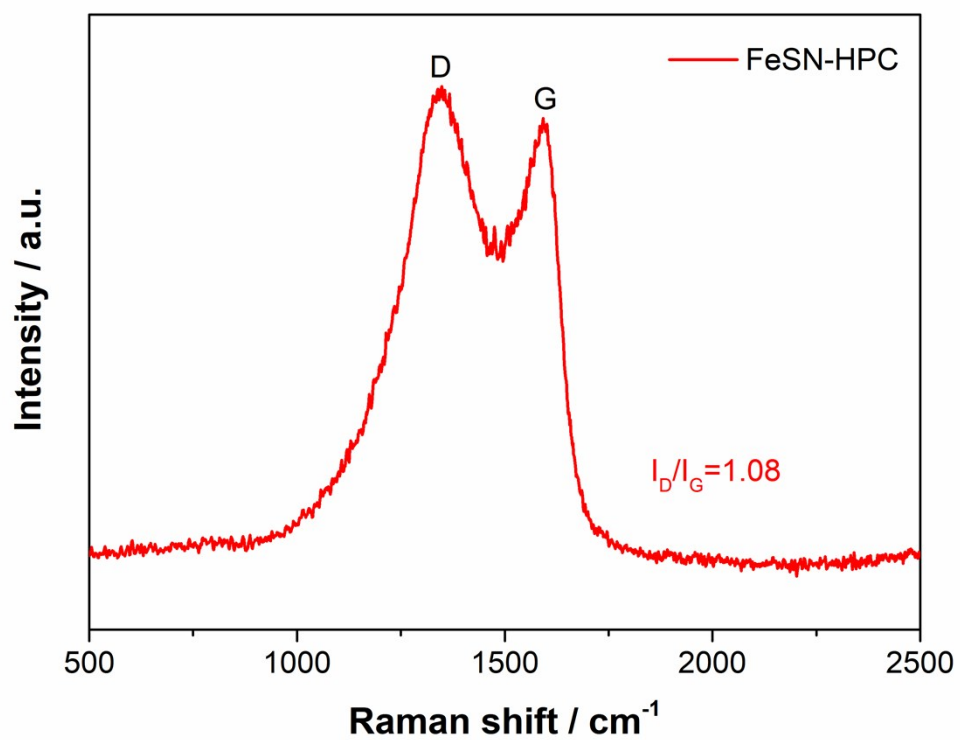

**Fig. S1** Raman spectrum of FeSN-HPC.

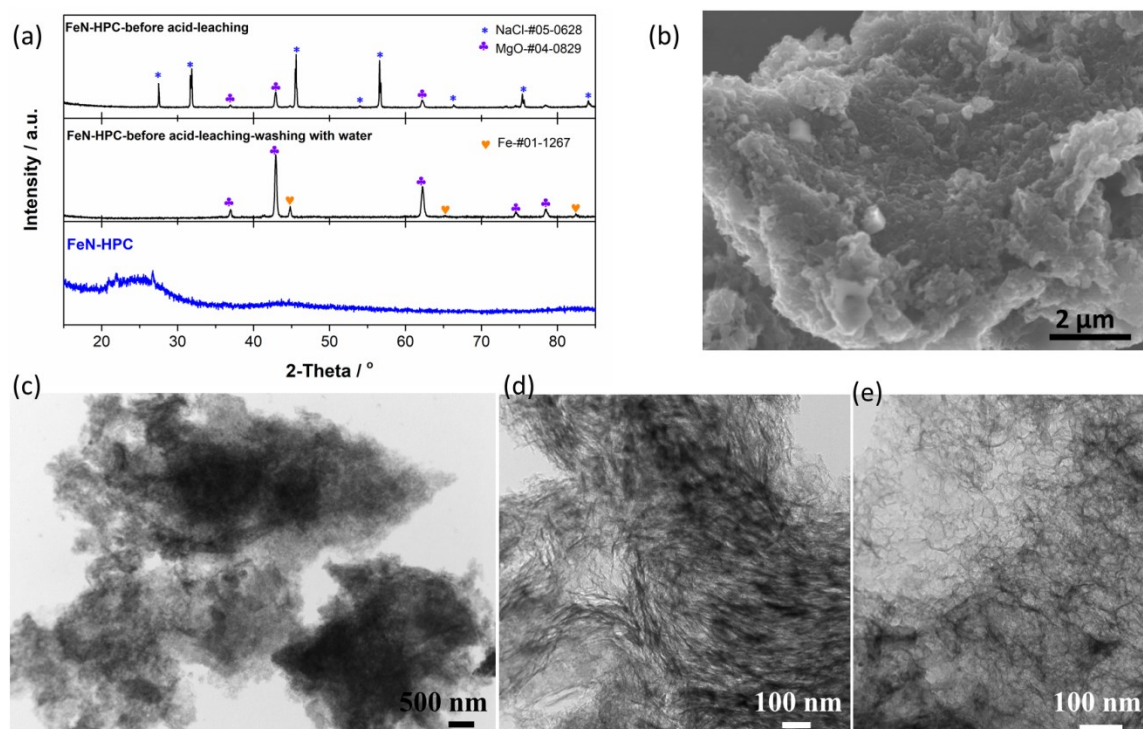

**Fig. S2** (a) XRD patterns of FeN-HPC during the preparation process; (b) SEM and (c-e) TEM images of FeN-HPC.

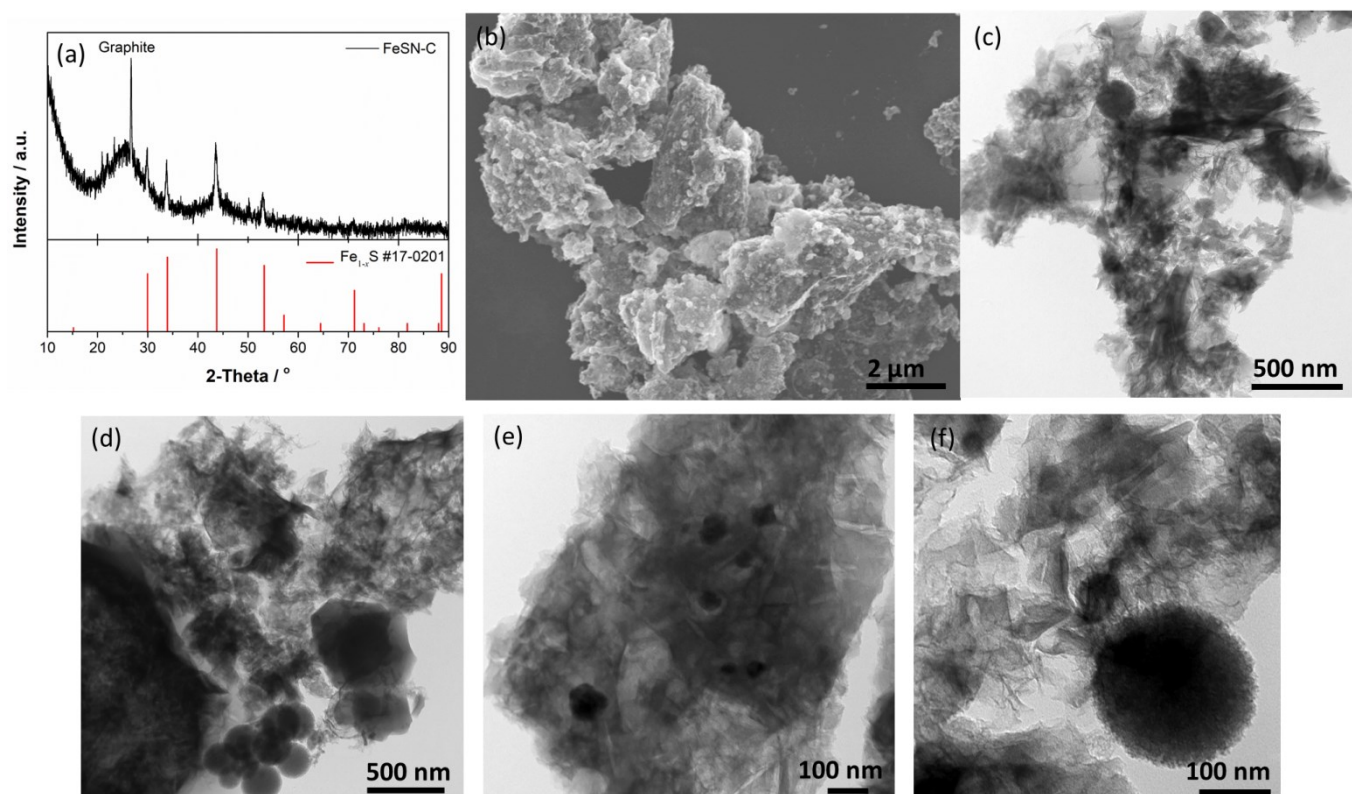

**Fig. S3** (a) XRD pattern, (b) SEM and (c-f) TEM images of FeSN-C.

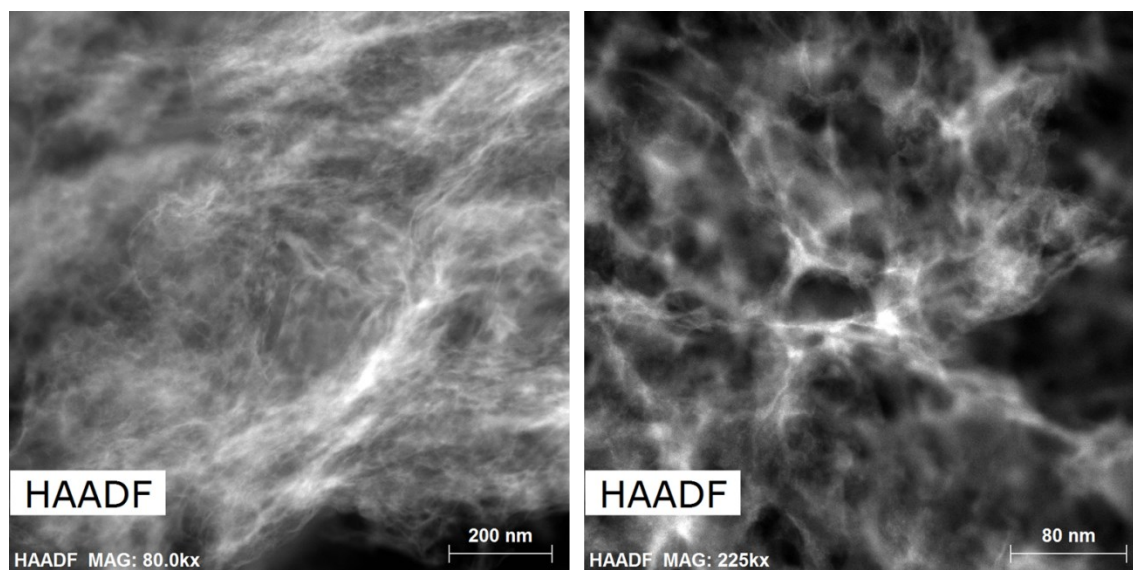

**Fig. S4** HAADF-STEM images of FeSN-HPC.

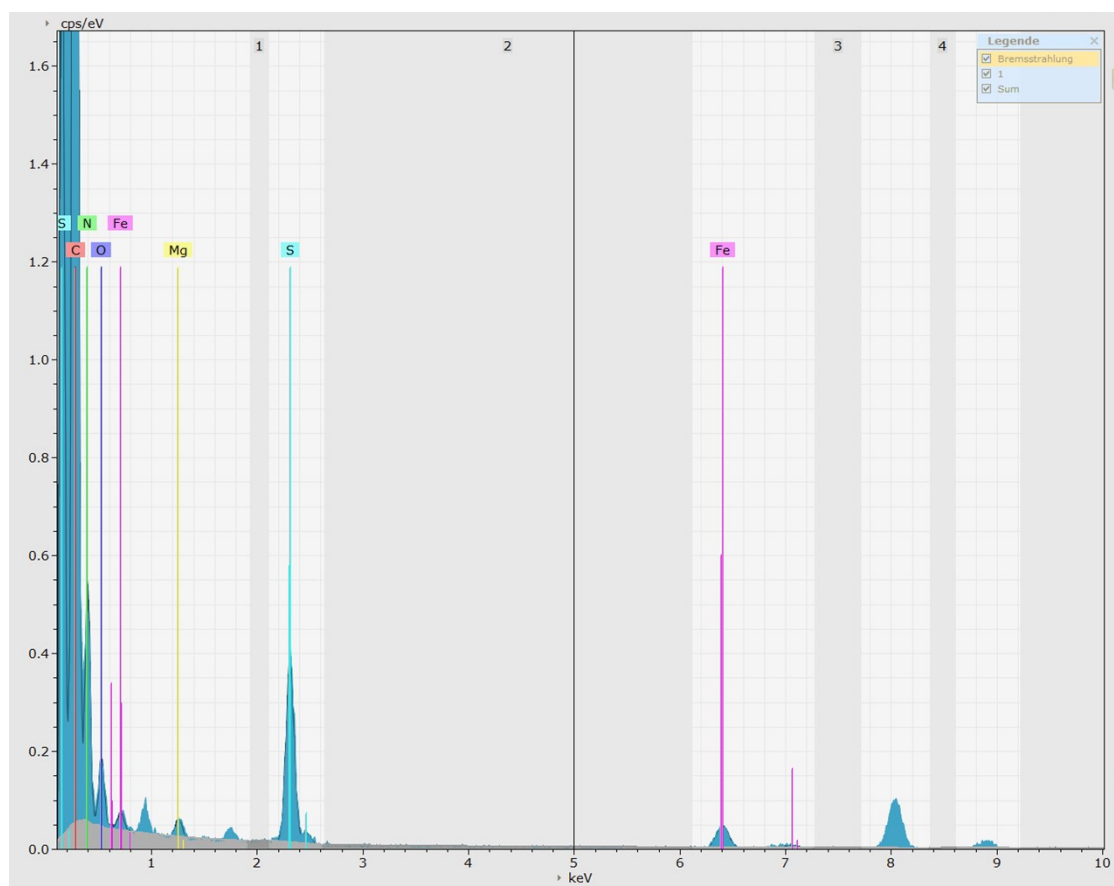

**Fig. S5** EDS spectrum of the FeSN-HPC.

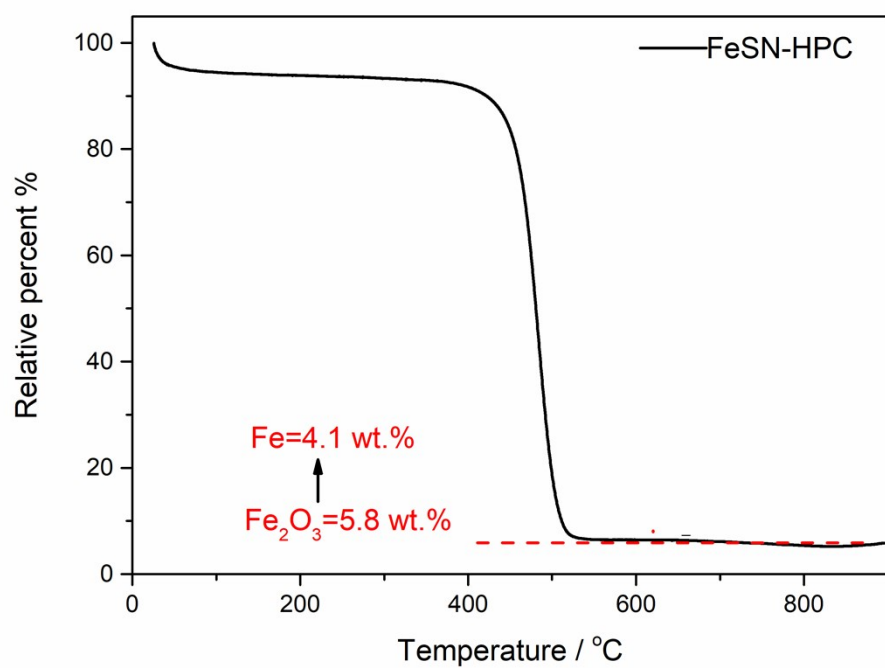

**Fig. S6** TGA curve of FeSN-HPC under air atmosphere.



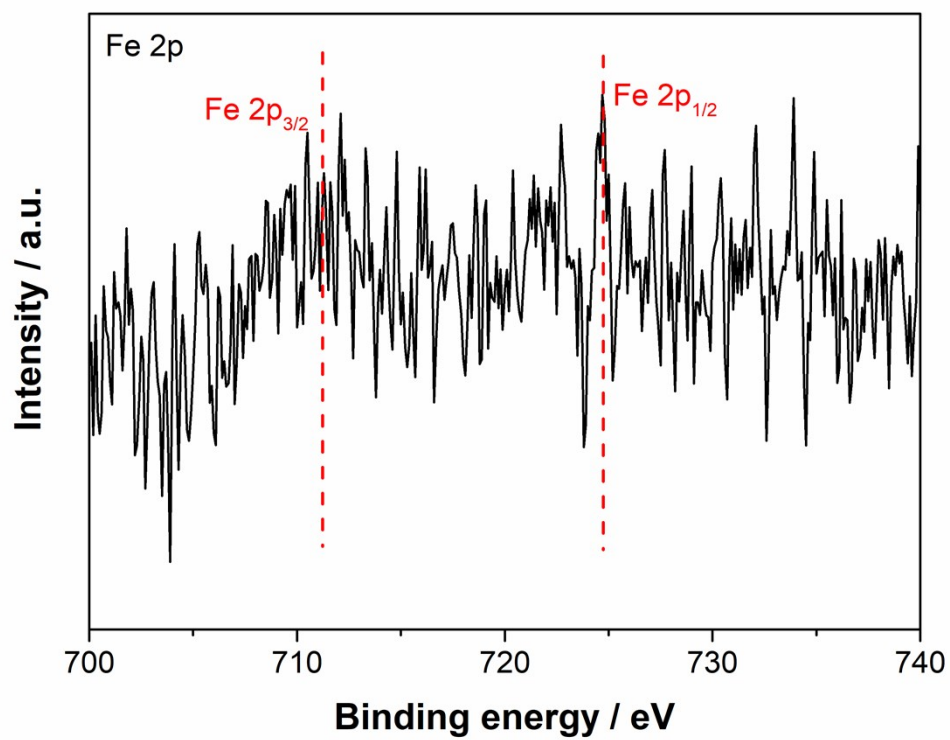

**Fig. S7** The high resolution Fe 2p XPS spectra of as-prepared FeSN-HPC.

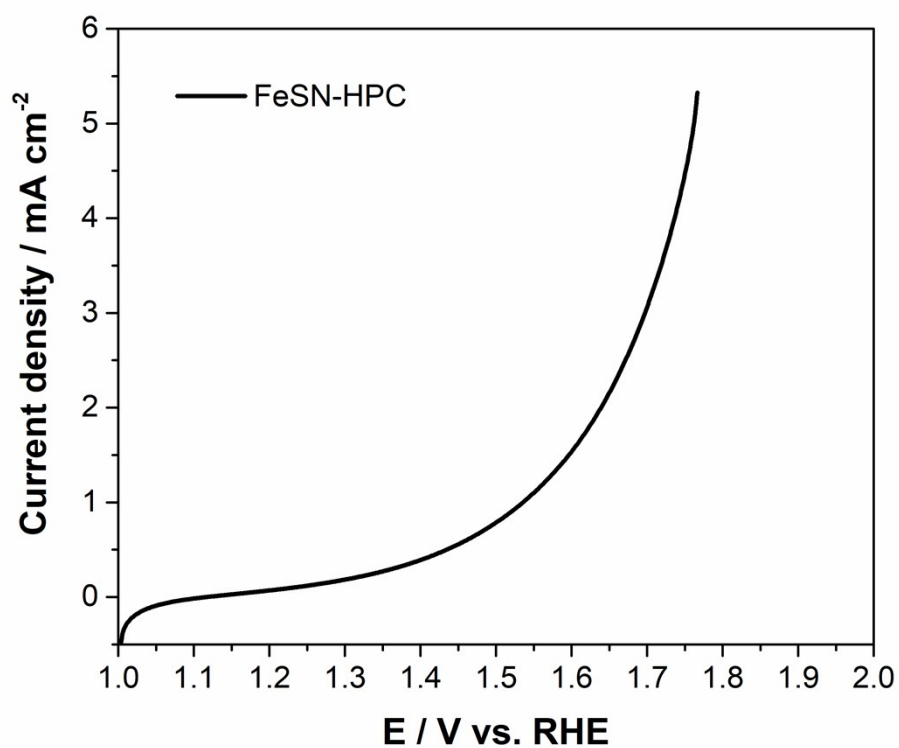

**Fig. S8** OER polarization curves of FeSN-HPC in O<sub>2</sub>-saturated 0.1 M KOH at a scanning rate of 10 mV s<sup>-1</sup> and a electrode rotating rate of 1600 rpm.

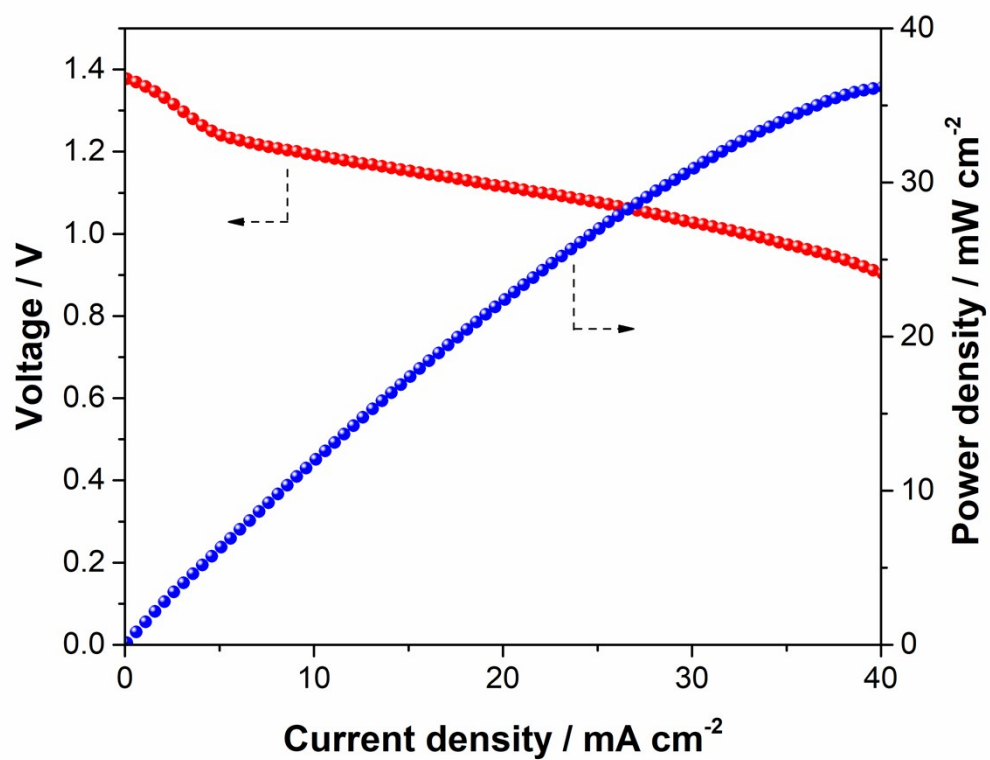

**Fig. S9** The discharge polarization and power density curves of solid ZAB with FeSN-HPC-loading air electrode.

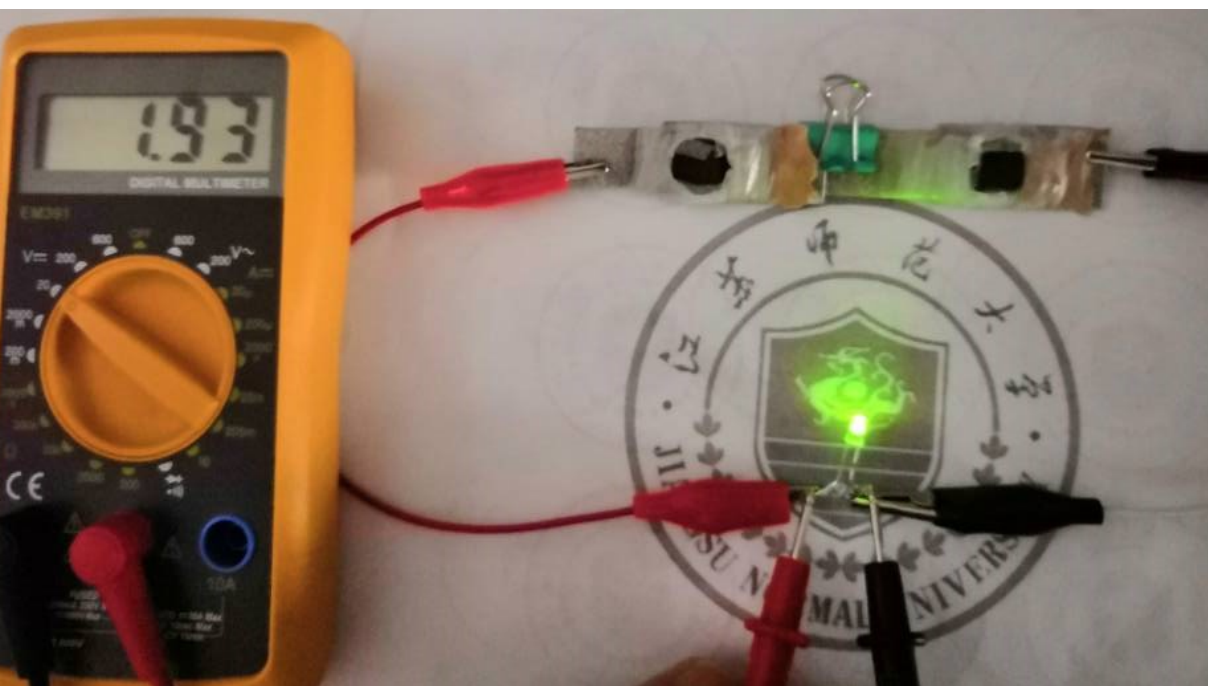

**Fig. S10** A photograph of a light LED powered by two FeSN-HPC-catalyzed ZABs in series. A multimeter showed that the working power of the light LED was 1.93 V.

**Table S1**  $^{57}\text{Fe}$  Mössbauer parameters ( $\delta_{\text{iso}}$ , Isomer Shift;  $\Delta E_Q$ , Quadrupole Splitting; FWHM, Full Width at Half-Maximum) and assignment to iron species for different Mössbauer sites

|                                                                                                                | $\delta_{\text{iso}}/$ | $\Delta E_Q/$ | FWHM/ | area % | Assignment                                              |
|----------------------------------------------------------------------------------------------------------------|------------------------|---------------|-------|--------|---------------------------------------------------------|
|                                                                                                                | mm s <sup>-1</sup>     |               |       |        |                                                         |
| <b>D1</b>                                                                                                      | 0.46                   | 1.02          | 0.62  | 42.90  | Fe <sup>II</sup> N <sub>4</sub> , LS <sup>1, 2</sup>    |
| <b>D2</b>                                                                                                      | 0.23                   | 3.50          | 0.67  | 12.70  | Fe <sup>II</sup> N <sub>4</sub> , MS <sup>1, 3, 4</sup> |
| <b>D3</b>                                                                                                      | 1.18                   | 3.53          | 0.65  | 10.60  | Fe <sup>II</sup> N <sub>4</sub> , HS <sup>1, 4</sup>    |
| <b>D4</b>                                                                                                      | 0.29                   | 0.86          | 0.74  | 33.80  | Fe <sup>III</sup> N <sub>4</sub> , HS <sup>5</sup>      |
| $\delta_{\text{iso}}$ : isomeric shift; $\Delta E_Q$ : quadrupole splitting; FWHM: full width at half maximum. |                        |               |       |        |                                                         |

**Table S2.** The electrochemical performance of different catalysts reported recently in O<sub>2</sub>-saturated 0.1 M KOH.

| Sample                        | $E_{\text{onset}} / \text{V}$ | $E_{1/2} / \text{V}$ | $n$       | Ref.      |
|-------------------------------|-------------------------------|----------------------|-----------|-----------|
| FeSN-HPC                      | 0.96                          | 0.86                 | 3.89-4.00 | This work |
| a-MnO <sub>x</sub> /TiC       | 0.96                          | 0.8                  | ~4.0      | 6         |
| Fe/Fe <sub>3</sub> C@N-C-NaCl | 0.970                         | 0.869                | >3.9      | 7         |
| Ionogel-Fe-C-N                | 1.00                          | 0.870                | 3.99      | 8         |
| Co 16%-NCNT-T800              | -                             | 0.815                | 3.25      | 9         |
| Fe@C-NG/NCNTs                 | 0.93                          | 0.84                 | 3.9-4.0   | 10        |
| Co@NCNT HMS                   | 0.980                         | 0.857                | 3.85      | 11        |
| N-CNT-900-NH <sub>3</sub>     | 1.02                          | 0.88                 | 3.88-4.00 | 12        |
| Co/N-BCNTs                    | -                             | 0.83                 | 3.75      | 13        |
| Co/CoP-HNC                    | 0.94                          | 0.83                 | 4.0       | 14        |

|                                          |       |       |        |    |
|------------------------------------------|-------|-------|--------|----|
| co-doped np-graphene                     | 0.987 | 0.845 | 3.9    | 15 |
| Zn/CoN-C                                 | 1.004 | 0.861 | 4.0    | 16 |
| P-T/rGO                                  | 0.94  | 0.79  | 3.48   | 17 |
| Fe <sub>3</sub> C@B <sub>1.0</sub> NPCFs | 0.968 | 0.832 | ~4.0   | 18 |
| Fe-S <sub>2</sub> N-C                    | 0.95  | 0.83  | > 3.94 | 19 |
| CoPNi-N/C                                | 0.93  | 0.84  | 3.9    | 20 |

## Reference

1. U. I. Kramm, J. Herranz, N. Larouche, T. M. Arruda, M. Lefevre, F. Jaouen, P. Bogdanoff, S. Fiechter, I. Abs-Wurmbach, S. Mukerjee and J. P. Dodelet, *Phys Chem Chem Phys*, 2012, **14**, 11673-11688.
2. Q. Jia, N. Ramaswamy, U. Tylus, K. Strickland, J. Li, A. Serov, K. Artyushkova, P. Atanassov, J. Anibal, C. Gumeci, S. C. Barton, M.-T. Sougrati, F. Jaouen, B. Halevi and S. Mukerjee, *Nano Energy*, 2016, **29**, 65-82.
3. U. I. Kramm, M. Lefevre, N. Larouche, D. Schmeisser and J. P. Dodelet, *J Am Chem Soc*, 2014, **136**, 978-985.
4. J. Wang, Z. Huang, W. Liu, C. Chang, H. Tang, Z. Li, W. Chen, C. Jia, T. Yao, S. Wei, Y. Wu and Y. Li, *J Am Chem Soc*, 2017, **139**, 17281-17284.
5. W. Liu, L. Zhang, X. Liu, X. Liu, X. Yang, S. Miao, W. Wang, A. Wang and T. Zhang, *J Am Chem Soc*, 2017, **139**, 10790-10798.
6. S. Song, W. Li, Y.-P. Deng, Y. Ruan, Y. Zhang, X. Qin and Z. Chen, *Nano Energy*, 2019, DOI: 10.1016/j.nanoen.2019.104208.
7. Y. Zhang, L.-B. Huang, W.-J. Jiang, X. Zhang, Y.-Y. Chen, Z. Wei, L.-J. Wan and J.-S. Hu, *J. Mater. Chem. A*, 2016, **4**, 7781-7787.
8. S. Liu, Z. Yang, M. Li, L. Liu, Y. Wang, W. Lv, Z. Qin, X. Zhao, P. Zhu and G. Wang, *Electrochimica Acta*, 2018, **265**, 221-231.
9. Y. Zhang, L. Lu, S. Zhang, Z. Lv, D. Yang, J. Liu, Y. Chen, X. Tian, H. Jin and W. Song, *Journal of Materials Chemistry A*, 2018, **6**, 5740-5745.
10. Q. Wang, Y. Lei, Z. Chen, N. Wu, Y. Wang, B. Wang and Y. Wang, *Journal of Materials Chemistry A*, 2018, **6**, 516-526.
11. Y. Li, J. Gao, F. Zhang, Q. Qian, Y. Liu and G. Zhang, *Journal of Materials Chemistry A*, 2018, **6**, 15523-15529.
12. X. Zhu, Y. Zhu, C. Tian, T. Jin, X. Yang, X. Jin, C. Li, H. Wang, H. Liu and S. Dai, *Journal of Materials Chemistry A*, 2017, **5**, 4507-4512.
13. R. Wang, T. Yan, L. Han, G. Chen, H. Li, J. Zhang, L. Shi and D. Zhang, *Journal of Materials Chemistry A*, 2018, **6**, 5752-5761.

14. V. Di Noto, E. Negro, K. Vezzù, F. Bertasi and G. Nawn, *The Electrochemical Society Interface*, 2015, **24**, 59-64.
15. H. J. Qiu, P. Du, K. Hu, J. Gao, H. Li, P. Liu, T. Ina, K. Ohara, Y. Ito and M. Chen, *Adv Mater*, 2019, **31**, e1900843.
16. Z. Lu, B. Wang, Y. Hu, W. Liu, Y. Zhao, R. Yang, Z. Li, J. Luo, B. Chi, Z. Jiang, M. Li, S. Mu, S. Liao, J. Zhang and X. Sun, *Angew Chem Int Ed Engl*, 2019, **58**, 2622-2626.
17. X. Long, D. Li, B. Wang, Z. Jiang, W. Xu, B. Wang, D. Yang and Y. Xia, *Angew Chem Int Ed Engl*, 2019, **58**, 11369-11373.
18. T. Liu, M. Li, X. Bo and M. Zhou, *J Colloid Interface Sci*, 2019, **533**, 709-722.
19. S. Liu, L. liu, X. Chen, Z. Yang, M. Li, Y. Wang, W. Lv, P. Zhu, X. Zhao and G. Wang, *Electrocatalysis*, 2019, **10**, 72-81.
20. Z. Li, H. He, H. Cao, S. Sun, W. Diao, D. Gao, P. Lu, S. Zhang, Z. Guo, M. Li, R. Liu, D. Ren, C. Liu, Y. Zhang, Z. Yang, J. Jiang and G. Zhang, *Applied Catalysis B: Environmental*, 2019, **240**, 112-121.
